# Supplementary material for: Transarterial therapy combined with bevacizumab plus immune checkpoint inhibitors as a neoadjuvant therapy for locally advanced HCC
Source: PubMed Central journal article supplement (PMC11700993; doi:10.3389/fimmu.2024.1469302), 2024-12-23
Supplement: DataSheet1.pdf [file DataSheet1.pdf]

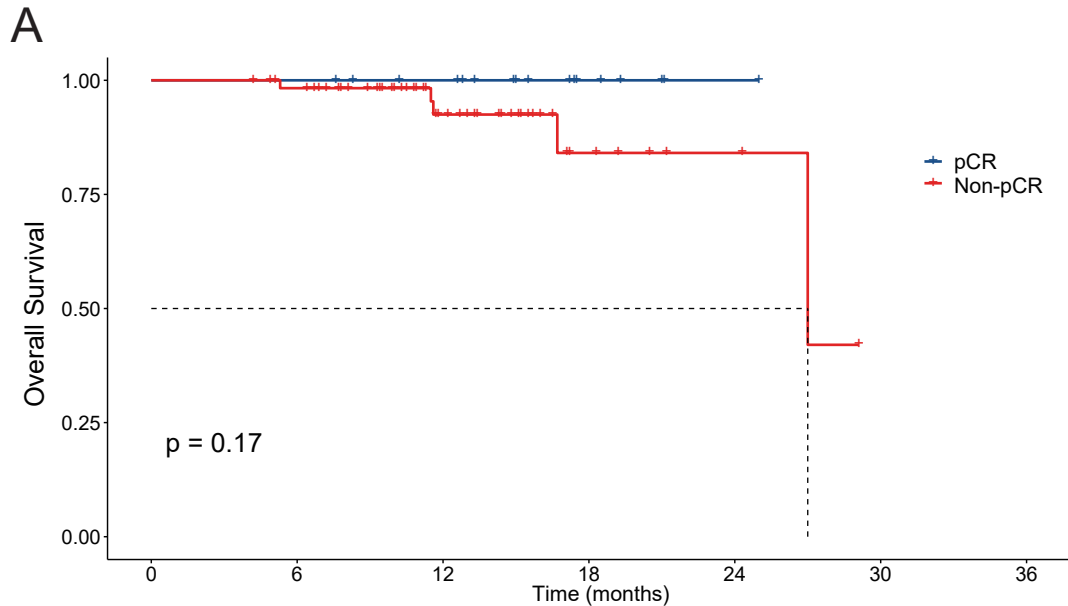

Number at risk

|         | 0  | 6  | 12 | 18 | 24 | 30 | 36 |
|---------|----|----|----|----|----|----|----|
| pCR     | 18 | 18 | 14 | 5  | 1  | 0  | 0  |
| Non-pCR | 61 | 57 | 29 | 7  | 3  | 0  | 0  |

Time (months)

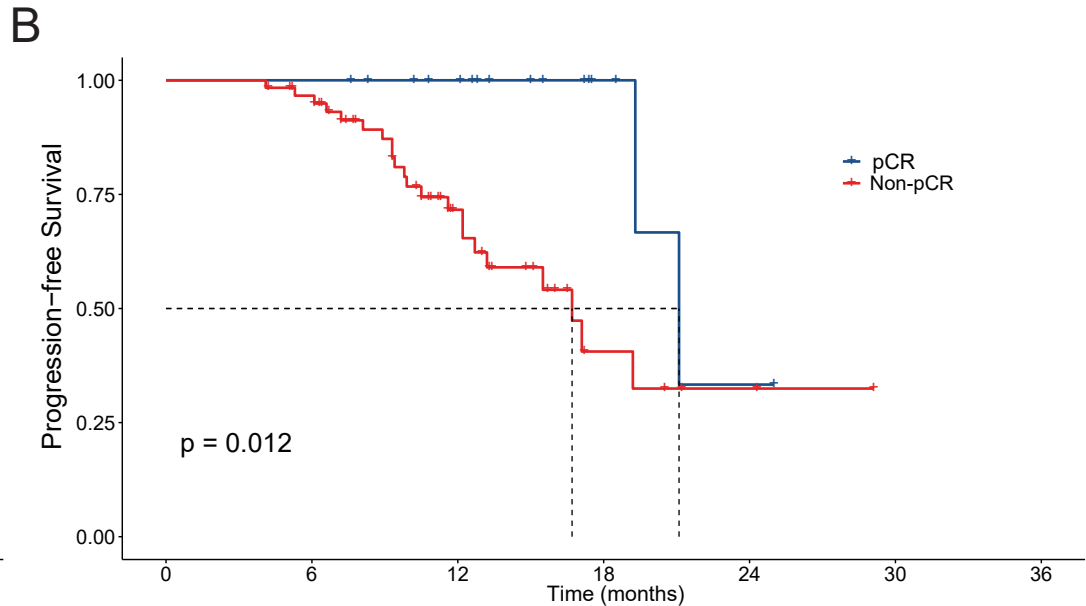

Number at risk

|         | 0  | 6  | 12 | 18 | 24 | 30 | 36 |
|---------|----|----|----|----|----|----|----|
| pCR     | 18 | 18 | 13 | 4  | 1  | 0  | 0  |
| Non-pCR | 61 | 56 | 23 | 5  | 2  | 0  | 0  |

Time (months)
