# Supplementary material for: Transarterial therapy combined with bevacizumab plus immune checkpoint inhibitors as a neoadjuvant therapy for locally advanced HCC
Source: PubMed Central journal article supplement (PMC11700993; doi:10.3389/fimmu.2024.1469302), 2024-12-23

# Waterfall plot for Target Lesion Tumor Size

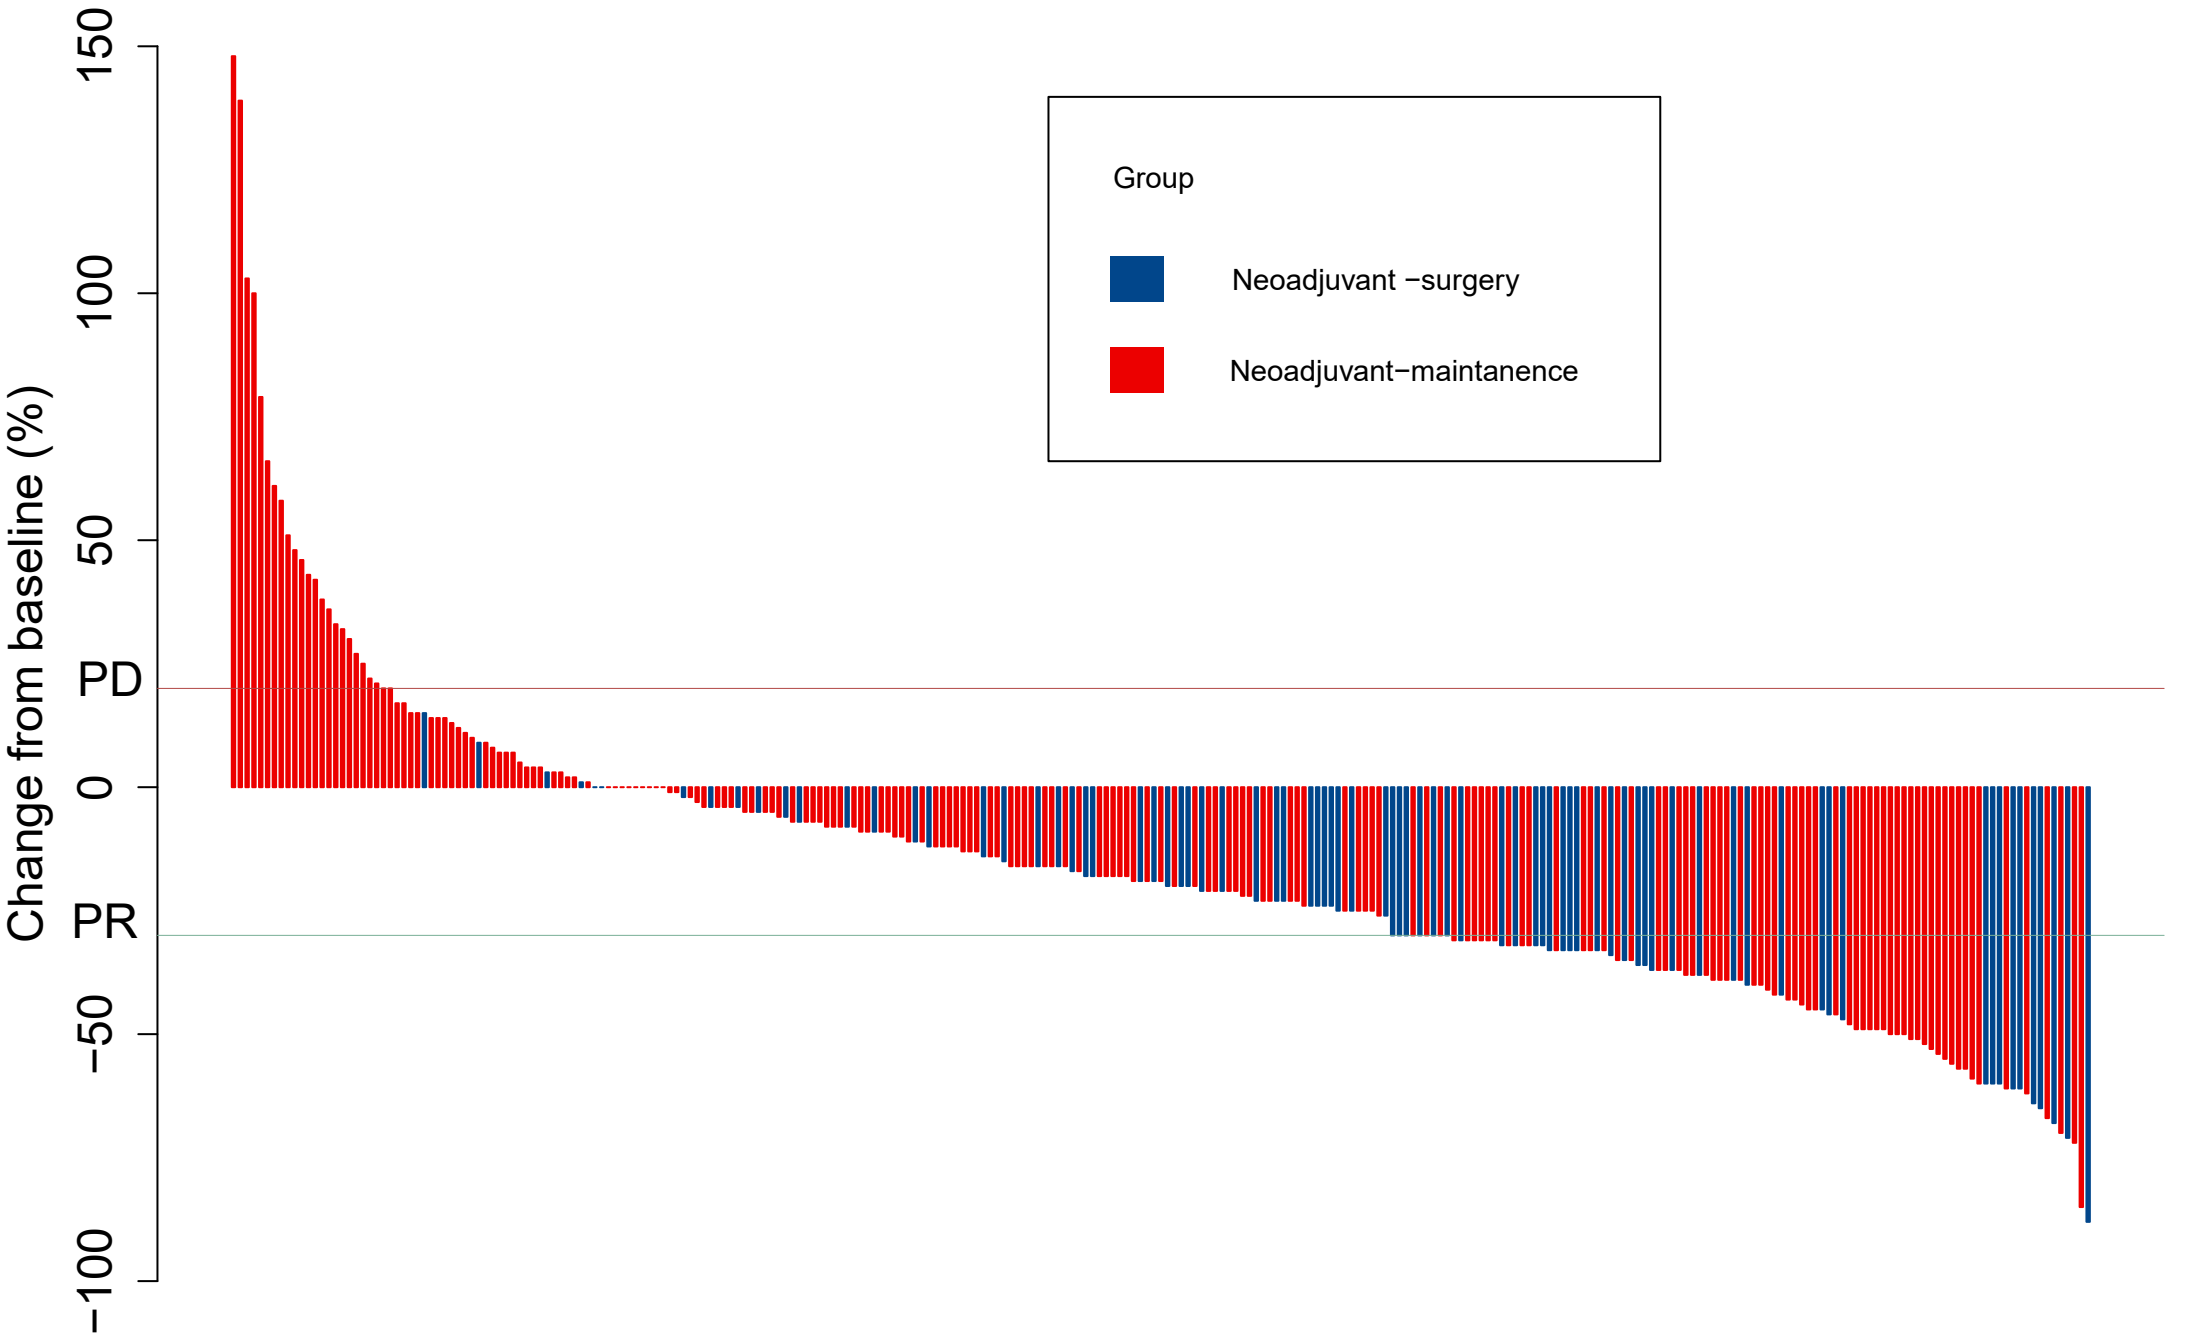

Supplement: DataSheet3.pdf [file DataSheet3.pdf]
